# Supplementary material for: Cytokine-induced molecular responses in airway smooth muscle cells inform genome-wide association studies of asthma
Source: PubMed Central journal article supplement (PMC7370514; doi:10.1186/s13073-020-00759-w), 2020-07-20

Additional File 3. Magnitude of transcriptional responses following 24 hours of exposure to cytokines. Volcano plots showing magnitude of transcriptional response following exposure to IL-13, IL-17A, or IL-13+IL-17A compared to vehicle. Colored dots represent transcripts DE at FDR<1%; dots in black are not significant in each panel. Log<sub>2</sub>(fold change) is plotted along the X-axis and -log<sub>10</sub>(P-value) is plotted on the Y-axis.

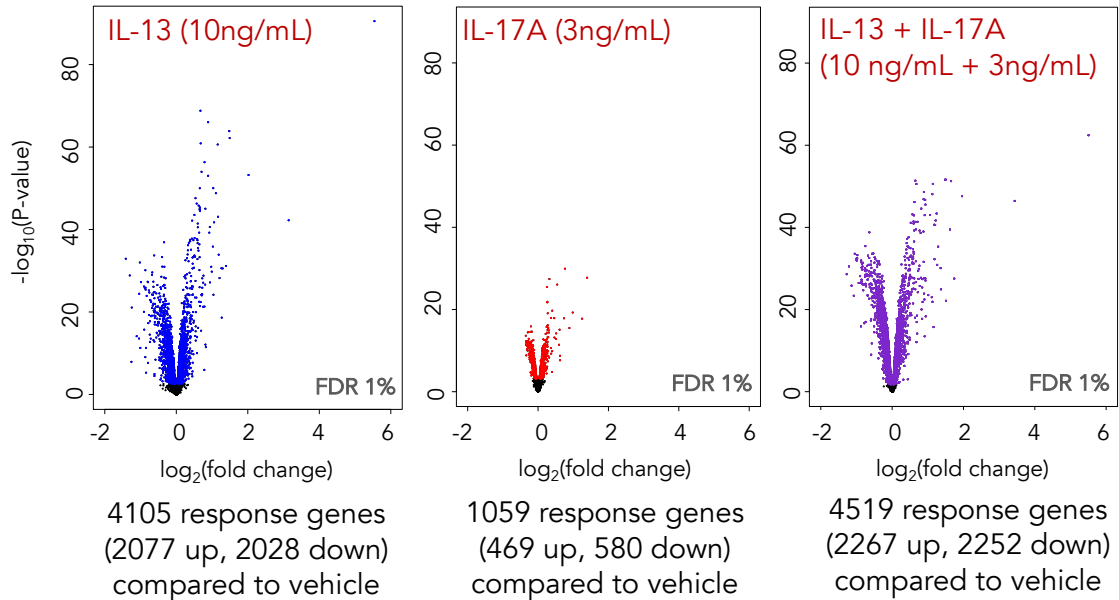

Supplement: 13073_2020_759_MOESM3_ESM.pdf [file 13073_2020_759_MOESM3_ESM.pdf]
