# Supplementary material for: Cytokine-induced molecular responses in airway smooth muscle cells inform genome-wide association studies of asthma
Source: PubMed Central journal article supplement (PMC7370514; doi:10.1186/s13073-020-00759-w), 2020-07-20

Additional File 9. Methylation responses following 24 hours of exposure to IL-13, IL-17A, or IL-13+IL-17A compared to vehicle. A) Volcano plot of methylation in IL-13-exposed cells compared to vehicle. B) Volcano plot of methylation in IL-17A-exposed cells compared to vehicle. C) Volcano plot of methylation in IL-13 + IL-17A-exposed cells compared to vehicle. Colored dots represent transcripts DE at FDR<5%; dots in black are not significant in each panel.  $\log_2(\text{fold change})$  is plotted along the X-axis and  $-\log_{10}(P\text{-value})$  is plotted on the Y-axis. D) Number of differentially methylated CpGs in ASMCs from individuals with and without asthma and in the full sample following cytokine exposure compared to vehicle. FDR=5%.

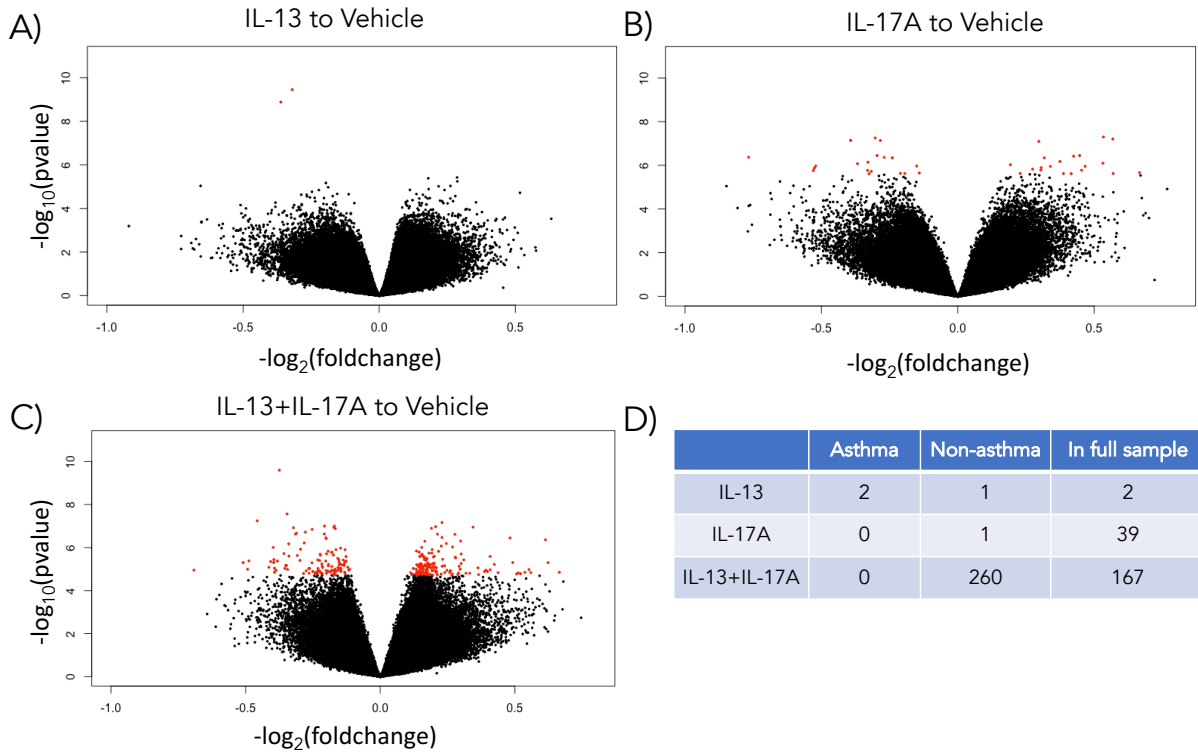

Supplement: 13073_2020_759_MOESM9_ESM.pdf [file 13073_2020_759_MOESM9_ESM.pdf]
