# Supplementary material for: Cytokine-induced molecular responses in airway smooth muscle cells inform genome-wide association studies of asthma
Source: PubMed Central journal article supplement (PMC7370514; doi:10.1186/s13073-020-00759-w), 2020-07-20

Additional File 10. Comparison of methylation levels at the 260 DMPs in controls following IL-13+IL-17 exposure to methylation levels among cases and controls at baseline (vehicle treated). The figure shows the absolute value of the change in methylation between the two groups: red circles = (exposed controls)-(baseline cases) and blue circles = (exposed controls)-(baseline controls). As the data suggests and the figure illustrates, methylation levels among cases at baseline (red) look more like the controls following IL-13+IL-17 stimulation.

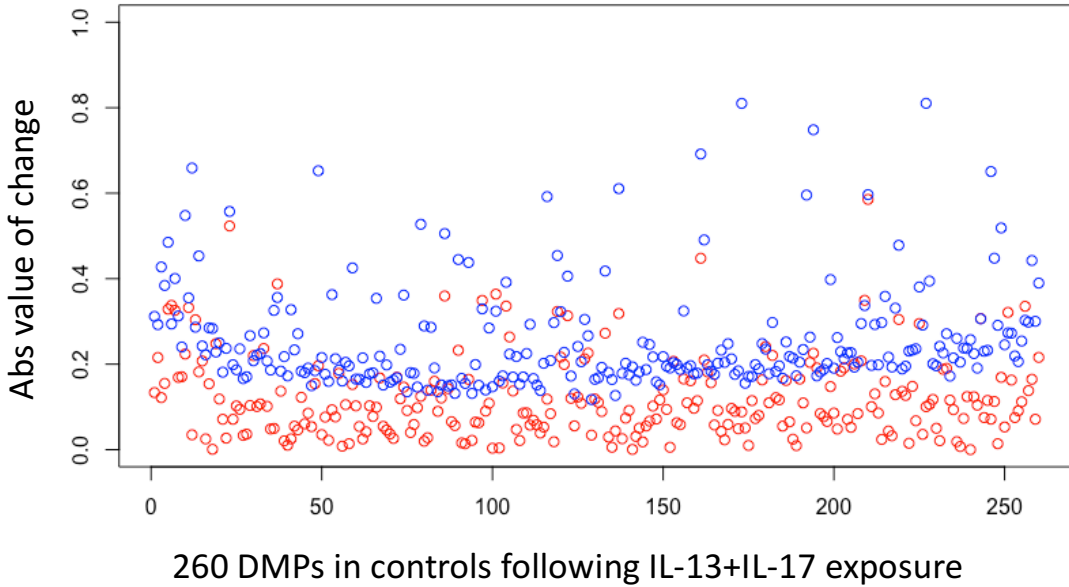

Supplement: 13073_2020_759_MOESM10_ESM.pdf [file 13073_2020_759_MOESM10_ESM.pdf]
