# Supplementary material for: Cytokine-induced molecular responses in airway smooth muscle cells inform genome-wide association studies of asthma
Source: PubMed Central journal article supplement (PMC7370514; doi:10.1186/s13073-020-00759-w), 2020-07-20

Additional File 12. A) Q-Q plot of GWAS results for bronchical responsiveness index (BRI) in the Hutterites (N=964). B) Manhattan plot of GWAS results for bronchical responsiveness index (BRI) in the Hutterites (N=964).

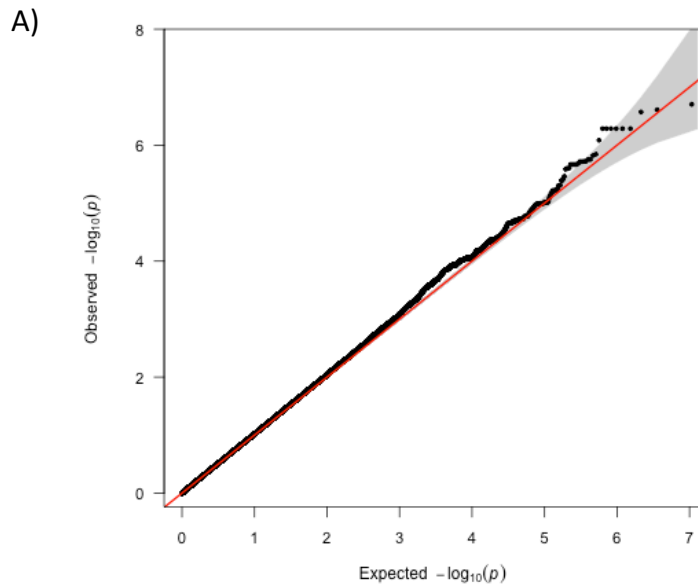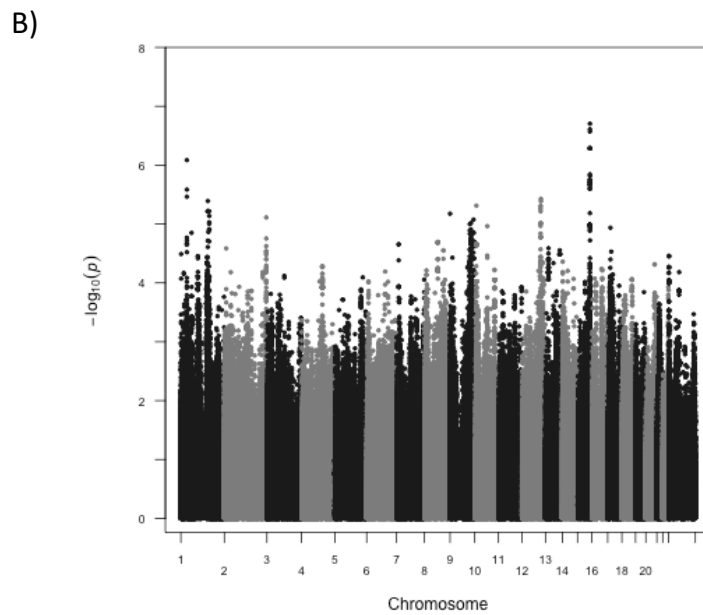

Supplement: 13073_2020_759_MOESM12_ESM.pdf [file 13073_2020_759_MOESM12_ESM.pdf]
