# Supplementary material for: Cytokine-induced molecular responses in airway smooth muscle cells inform genome-wide association studies of asthma
Source: PubMed Central journal article supplement (PMC7370514; doi:10.1186/s13073-020-00759-w), 2020-07-20

Additional File 17. Venn diagram illustrating overlaps of molecular QTLs (e- and meQTLs;  $lfsr < 0.05$ ), BRI GWAS SNPs ( $P < 0.01$ ), and contractile response (co) QTLs ( $P < 0.01$ ).

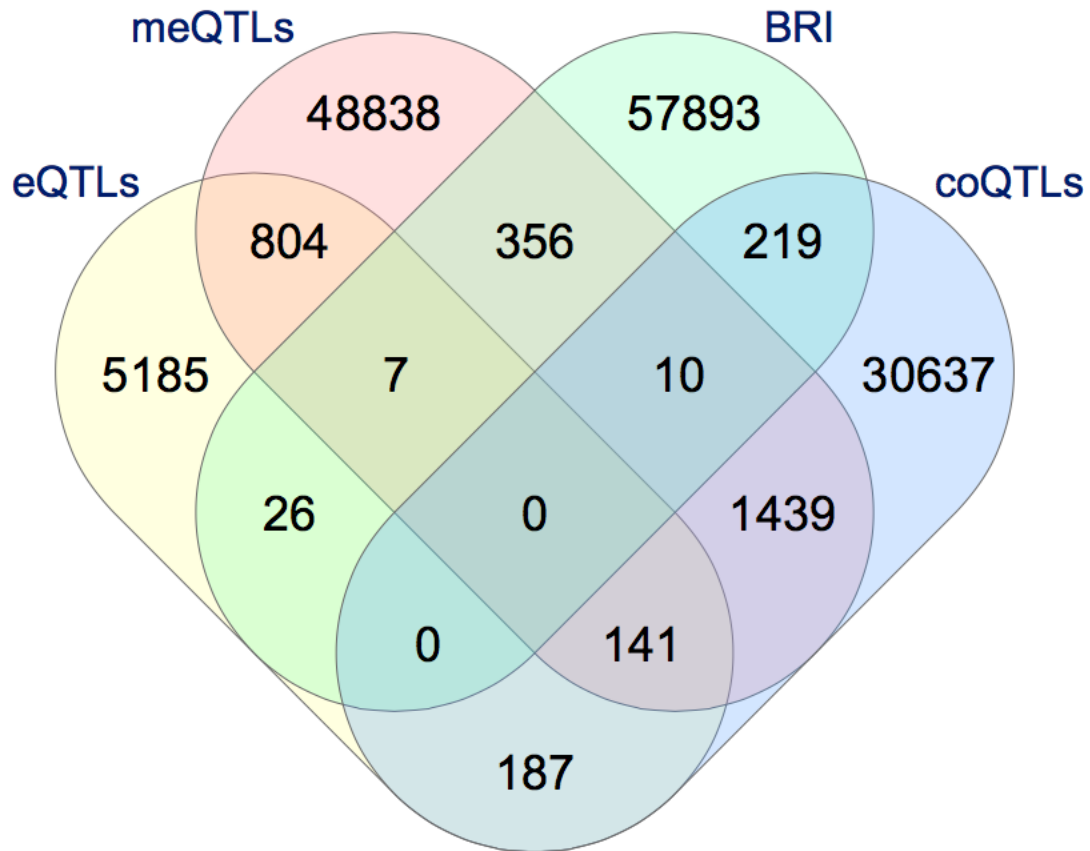

Supplement: 13073_2020_759_MOESM17_ESM.pdf [file 13073_2020_759_MOESM17_ESM.pdf]
