# Supplementary material for: Cytokine-induced molecular responses in airway smooth muscle cells inform genome-wide association studies of asthma
Source: PubMed Central journal article supplement (PMC7370514; doi:10.1186/s13073-020-00759-w), 2020-07-20
Supplement: 13073_2020_759_MOESM18_ESM.pdf [file 13073_2020_759_MOESM18_ESM.pdf]

Additional File 18. eQTLs (lfsr<0.01), meQTLs (lfsr<0.05), and contractile response (co)QTLs ( $P<0.01$ ) that are also BRI GWAS SNPs ( $P<0.01$ ).

| Number | Source | Position    | P value    |
|--------|--------|-------------|------------|
| 1      | eQTL   | 1:53073327  | 8.09E-08   |
| 2      | eQTL   | 16:11343547 | 2.12E-05   |
| 3      | eQTL   | 16:11345699 | 3.50E-05   |
| 4      | eQTL   | 16:11350965 | 5.26E-05   |
| 5      | eQTL   | 16:11351211 | 3.69E-05   |
| 6      | eQTL   | 16:11355222 | 5.40E-05   |
| 7      | eQTL   | 2:238968634 | 0.00143172 |
| 8      | eQTL   | 20:21575866 | 0.00052856 |
| 9      | eQTL   | 4:103569283 | 9.00E-05   |
| 10     | eQTL   | 4:103578637 | 0.00013314 |
| 11     | eQTL   | 4:103759189 | 2.38E-05   |
| 12     | eQTL   | 4:103764993 | 8.05E-05   |
| 13     | eQTL   | 4:103765916 | 8.59E-05   |
| 14     | eQTL   | 4:103767339 | 8.12E-05   |
| 15     | eQTL   | 4:103769234 | 1.73E-05   |
| 16     | eQTL   | 4:103777392 | 5.51E-05   |
| 17     | eQTL   | 4:103785857 | 3.91E-05   |
| 18     | eQTL   | 4:103786588 | 3.81E-05   |
| 19     | eQTL   | 4:103789810 | 3.42E-05   |
| 20     | eQTL   | 4:103794536 | 2.95E-05   |
| 21     | eQTL   | 4:103796908 | 2.72E-05   |
| 22     | eQTL   | 4:103799532 | 2.45E-05   |
| 23     | eQTL   | 5:76117065  | 1.88E-05   |
| 24     | eQTL   | 5:76118333  | 1.05E-05   |
| 25     | eQTL   | 5:76119049  | 1.60E-05   |
| 26     | eQTL   | 5:76119105  | 1.20E-05   |
| 27     | eQTL   | 5:76119365  | 5.31E-06   |
| 28     | eQTL   | 5:76119712  | 1.35E-05   |
| 29     | eQTL   | 5:76127135  | 4.06E-06   |
| 30     | eQTL   | 5:76128334  | 9.72E-06   |
| 31     | eQTL   | 7:90156945  | 0.0063208  |
| 32     | eQTL   | 7:90210862  | 0.00936515 |
| 33     | eQTL   | 7:90257651  | 0.01129679 |
| 1      | meQTL  | 1:53187767  | 2.22E-16   |
| 2      | meQTL  | 1:53187911  | 2.22E-16   |
| 3      | meQTL  | 1:53189297  | 2.22E-16   |
| 4      | meQTL  | 1:53195271  | 2.22E-16   |
| 5      | meQTL  | 1:53195384  | 2.22E-16   |
| 6      | meQTL  | 1:53195481  | 2.22E-16   |
| 7      | meQTL  | 1:53195800  | 2.22E-16   |
| 8      | meQTL  | 1:53196666  | 2.22E-16   |

|    |       |             |          |
|----|-------|-------------|----------|
| 9  | meQTL | 1:53196689  | 2.22E-16 |
| 10 | meQTL | 11:65638719 | 2.22E-16 |
| 11 | meQTL | 11:65641033 | 2.22E-16 |
| 12 | meQTL | 8:91678575  | 2.22E-16 |
| 13 | meQTL | 8:91680519  | 2.22E-16 |
| 14 | meQTL | 8:91680957  | 2.22E-16 |
| 15 | meQTL | 8:91681221  | 2.22E-16 |
| 16 | meQTL | 8:91681557  | 2.22E-16 |
| 17 | meQTL | 8:91682025  | 2.22E-16 |
| 18 | meQTL | 8:91682407  | 2.22E-16 |
| 19 | meQTL | 8:91682498  | 2.22E-16 |
| 20 | meQTL | 8:91683028  | 2.22E-16 |
| 21 | meQTL | 8:91684256  | 2.22E-16 |
| 22 | meQTL | 8:91685814  | 2.22E-16 |
| 23 | meQTL | 8:1809895   | 4.97E-18 |
| 24 | meQTL | 1:53193576  | 1.11E-16 |
| 25 | meQTL | 1:53193796  | 1.11E-16 |
| 26 | meQTL | 1:53195686  | 1.11E-16 |
| 27 | meQTL | 1:53195926  | 1.11E-16 |
| 28 | meQTL | 1:53196440  | 1.11E-16 |
| 29 | meQTL | 8:91677926  | 1.11E-16 |
| 30 | meQTL | 8:91678515  | 1.11E-16 |
| 31 | meQTL | 8:91678587  | 1.11E-16 |
| 32 | meQTL | 8:91678954  | 1.11E-16 |
| 33 | meQTL | 8:91679451  | 1.11E-16 |
| 34 | meQTL | 8:91684776  | 1.11E-16 |
| 35 | meQTL | 8:91685431  | 1.11E-16 |
| 36 | meQTL | 8:91676709  | 2.22E-16 |
| 37 | meQTL | 9:5610320   | 1.55E-15 |
| 38 | meQTL | 9:5612750   | 2.66E-15 |
| 39 | meQTL | 9:5612177   | 3.55E-15 |
| 40 | meQTL | 10:9804989  | 1.58E-11 |
| 41 | meQTL | 8:94754924  | 2.86E-11 |
| 42 | meQTL | 8:94754865  | 2.87E-11 |
| 43 | meQTL | 8:94753789  | 2.96E-11 |
| 44 | meQTL | 8:94745386  | 2.99E-11 |
| 45 | meQTL | 8:94750826  | 3.26E-11 |
| 46 | meQTL | 8:94752754  | 4.06E-11 |
| 47 | meQTL | 8:94749193  | 4.31E-11 |
| 48 | meQTL | 8:94749565  | 4.41E-11 |
| 49 | meQTL | 8:94750080  | 1.01E-10 |
| 50 | meQTL | 1:100182884 | 6.67E-10 |
| 51 | meQTL | 1:100185282 | 7.62E-10 |
| 52 | meQTL | 11:19466475 | 1.74E-09 |
| 53 | meQTL | 8:120166904 | 3.38E-09 |

|    |       |              |          |
|----|-------|--------------|----------|
| 54 | meQTL | 8:120166800  | 3.42E-09 |
| 55 | meQTL | 8:120163391  | 3.52E-09 |
| 56 | meQTL | 8:120163500  | 3.52E-09 |
| 57 | meQTL | 8:120164442  | 3.56E-09 |
| 58 | meQTL | 3:43794256   | 5.11E-09 |
| 59 | meQTL | 6:164242203  | 9.42E-09 |
| 60 | meQTL | 6:164242955  | 9.54E-09 |
| 61 | meQTL | 6:164243832  | 9.67E-09 |
| 62 | meQTL | 12:41219224  | 9.68E-09 |
| 63 | meQTL | 6:164246581  | 1.41E-08 |
| 64 | meQTL | 1:100047845  | 2.53E-08 |
| 65 | meQTL | 1:100049692  | 3.03E-08 |
| 66 | meQTL | 1:100050789  | 3.06E-08 |
| 67 | meQTL | 5:3339183    | 9.19E-08 |
| 68 | meQTL | 14:51230251  | 1.30E-07 |
| 69 | meQTL | 11:10398518  | 2.29E-07 |
| 70 | meQTL | 5:44816984   | 2.73E-07 |
| 71 | meQTL | 1:152362972  | 3.06E-07 |
| 72 | meQTL | 17:64579445  | 3.11E-07 |
| 73 | meQTL | 12:131608476 | 3.12E-07 |
| 74 | meQTL | 1:152363874  | 3.20E-07 |
| 75 | meQTL | 1:152365655  | 3.39E-07 |
| 76 | meQTL | 11:63058759  | 3.44E-07 |
| 77 | meQTL | 11:63058337  | 3.45E-07 |
| 78 | meQTL | 12:50531968  | 4.05E-07 |
| 79 | meQTL | 1:152360820  | 4.15E-07 |
| 80 | meQTL | 2:240178581  | 4.92E-07 |
| 81 | meQTL | 2:240178781  | 4.95E-07 |
| 82 | meQTL | 8:2879070    | 5.00E-07 |
| 83 | meQTL | 12:33145845  | 6.07E-07 |
| 84 | meQTL | 8:2881902    | 6.39E-07 |
| 85 | meQTL | 9:90709377   | 6.45E-07 |
| 86 | meQTL | 1:100048333  | 1.34E-06 |
| 87 | meQTL | 9:822594     | 1.83E-06 |
| 88 | meQTL | 1:97604184   | 1.89E-06 |
| 89 | meQTL | 3:194317010  | 2.04E-06 |
| 90 | meQTL | 1:97600910   | 2.16E-06 |
| 91 | meQTL | 4:120011540  | 2.16E-06 |
| 92 | meQTL | 1:97600310   | 2.27E-06 |
| 93 | meQTL | 9:90712434   | 2.49E-06 |
| 94 | meQTL | 9:90712312   | 2.66E-06 |
| 95 | meQTL | 9:90712331   | 2.67E-06 |
| 96 | meQTL | 12:33144023  | 2.81E-06 |
| 97 | meQTL | 12:33144084  | 2.81E-06 |
| 98 | meQTL | 12:33144337  | 2.81E-06 |

|     |       |             |          |
|-----|-------|-------------|----------|
| 99  | meQTL | 12:33142560 | 2.83E-06 |
| 100 | meQTL | 12:33142937 | 2.83E-06 |
| 101 | meQTL | 9:90712552  | 3.06E-06 |
| 102 | meQTL | 5:76119365  | 4.66E-06 |
| 103 | meQTL | 8:8766536   | 5.60E-06 |
| 104 | meQTL | 8:8766635   | 5.68E-06 |
| 105 | meQTL | 2:45272197  | 5.81E-06 |
| 106 | meQTL | 3:194323620 | 7.65E-06 |
| 107 | meQTL | 12:1912526  | 8.58E-06 |
| 108 | meQTL | 12:50654894 | 9.95E-06 |
| 109 | meQTL | 8:8763983   | 1.05E-05 |
| 110 | meQTL | 11:65635559 | 1.12E-05 |
| 111 | meQTL | 1:152363201 | 1.59E-05 |
| 112 | meQTL | 1:152362727 | 1.65E-05 |
| 113 | meQTL | 15:77819778 | 1.92E-05 |
| 114 | meQTL | 16:85219630 | 2.00E-05 |
| 115 | meQTL | 7:11277857  | 2.09E-05 |
| 116 | meQTL | 8:114507204 | 2.27E-05 |
| 117 | meQTL | 15:77823013 | 2.30E-05 |
| 118 | meQTL | 8:114505160 | 2.36E-05 |
| 119 | meQTL | 8:114507145 | 2.38E-05 |
| 120 | meQTL | 20:61821519 | 2.41E-05 |
| 121 | meQTL | 7:11277413  | 2.55E-05 |
| 122 | meQTL | 16:85218567 | 2.62E-05 |
| 123 | meQTL | 20:61826127 | 2.98E-05 |
| 124 | meQTL | 20:61826132 | 2.98E-05 |
| 125 | meQTL | 12:32278032 | 3.11E-05 |
| 126 | meQTL | 13:97944331 | 3.65E-05 |
| 127 | meQTL | 8:120914270 | 3.82E-05 |
| 128 | meQTL | 8:120914432 | 3.82E-05 |
| 129 | meQTL | 8:120914527 | 3.82E-05 |
| 130 | meQTL | 8:120914908 | 3.82E-05 |
| 131 | meQTL | 8:120915232 | 3.83E-05 |
| 132 | meQTL | 8:120915862 | 3.83E-05 |
| 133 | meQTL | 8:120916394 | 3.83E-05 |
| 134 | meQTL | 8:120916555 | 3.84E-05 |
| 135 | meQTL | 8:120916651 | 3.84E-05 |
| 136 | meQTL | 17:32197482 | 4.22E-05 |
| 137 | meQTL | 17:32196551 | 4.99E-05 |
| 138 | meQTL | 17:32196268 | 5.10E-05 |
| 139 | meQTL | 17:32195732 | 5.16E-05 |
| 140 | meQTL | 17:32195167 | 5.23E-05 |
| 141 | meQTL | 17:32195714 | 5.31E-05 |
| 142 | meQTL | 8:114499211 | 6.32E-05 |
| 143 | meQTL | 5:76119712  | 6.39E-05 |

|     |       |              |            |
|-----|-------|--------------|------------|
| 144 | meQTL | 16:8952113   | 6.40E-05   |
| 145 | meQTL | 5:76119049   | 6.50E-05   |
| 146 | meQTL | 8:114505777  | 6.57E-05   |
| 147 | meQTL | 16:85262290  | 6.63E-05   |
| 148 | meQTL | 5:76117065   | 6.74E-05   |
| 149 | meQTL | 6:121847256  | 6.81E-05   |
| 150 | meQTL | 4:120013271  | 6.99E-05   |
| 151 | meQTL | 8:114501219  | 7.41E-05   |
| 152 | meQTL | 7:157735442  | 7.72E-05   |
| 153 | meQTL | 20:61821068  | 8.74E-05   |
| 154 | meQTL | 5:76119105   | 8.81E-05   |
| 155 | meQTL | 11:93753048  | 9.47E-05   |
| 156 | meQTL | 11:93753037  | 9.48E-05   |
| 157 | meQTL | 11:93752680  | 9.50E-05   |
| 158 | meQTL | 11:93749872  | 9.63E-05   |
| 159 | meQTL | 11:93750050  | 9.63E-05   |
| 160 | meQTL | 15:74611781  | 0.00010924 |
| 161 | meQTL | 7:157735525  | 0.00011314 |
| 162 | meQTL | 8:11554261   | 0.00011571 |
| 163 | meQTL | 5:160229162  | 0.00011977 |
| 164 | meQTL | 5:160228932  | 0.00012013 |
| 165 | meQTL | 5:160228878  | 0.00012029 |
| 166 | meQTL | 6:121861658  | 0.00012787 |
| 167 | meQTL | 6:121860377  | 0.00012862 |
| 168 | meQTL | 6:121862617  | 0.00012937 |
| 169 | meQTL | 17:32198086  | 0.00013155 |
| 170 | meQTL | 5:76118333   | 0.00013474 |
| 171 | meQTL | 6:121862901  | 0.00013771 |
| 172 | meQTL | 13:103664563 | 0.00014809 |
| 173 | meQTL | 7:157735360  | 0.00015044 |
| 174 | meQTL | 5:160229610  | 0.00015259 |
| 175 | meQTL | 4:120011117  | 0.00015872 |
| 176 | meQTL | 16:85258569  | 0.00016002 |
| 177 | meQTL | 7:157742912  | 0.00016078 |
| 178 | meQTL | 16:8947128   | 0.00016212 |
| 179 | meQTL | 7:157742978  | 0.00016413 |
| 180 | meQTL | 5:160229021  | 0.00016684 |
| 181 | meQTL | 5:160227970  | 0.00017029 |
| 182 | meQTL | 12:114014227 | 0.00017472 |
| 183 | meQTL | 11:65630698  | 0.00017596 |
| 184 | meQTL | 7:157735216  | 0.00017696 |
| 185 | meQTL | 11:65623347  | 0.00017736 |
| 186 | meQTL | 18:60026931  | 0.00017747 |
| 187 | meQTL | 18:60027005  | 0.00017759 |
| 188 | meQTL | 11:65623519  | 0.00017801 |

|     |       |             |            |
|-----|-------|-------------|------------|
| 189 | meQTL | 11:65621995 | 0.00017824 |
| 190 | meQTL | 11:65629934 | 0.00017945 |
| 191 | meQTL | 11:65630101 | 0.00017979 |
| 192 | meQTL | 16:85260802 | 0.00018004 |
| 193 | meQTL | 11:65631167 | 0.00018016 |
| 194 | meQTL | 5:160230008 | 0.00020975 |
| 195 | meQTL | 6:148882824 | 0.00022513 |
| 196 | meQTL | 4:103375303 | 0.0002454  |
| 197 | meQTL | 5:172094062 | 0.00025761 |
| 198 | meQTL | 15:48060331 | 0.00028099 |
| 199 | meQTL | 15:48061510 | 0.00028547 |
| 200 | meQTL | 8:120194297 | 0.00029299 |
| 201 | meQTL | 8:120193289 | 0.00030376 |
| 202 | meQTL | 8:120189693 | 0.00031489 |
| 203 | meQTL | 8:120189690 | 0.00031514 |
| 204 | meQTL | 8:120190284 | 0.00031739 |
| 205 | meQTL | 1:210002271 | 0.00031766 |
| 206 | meQTL | 7:157744142 | 0.00032117 |
| 207 | meQTL | 8:120189822 | 0.00032404 |
| 208 | meQTL | 8:120189729 | 0.00032442 |
| 209 | meQTL | 8:120189392 | 0.00032947 |
| 210 | meQTL | 8:120188880 | 0.00033382 |
| 211 | meQTL | 8:120188608 | 0.00033674 |
| 212 | meQTL | 8:120188617 | 0.00033981 |
| 213 | meQTL | 8:120187928 | 0.00034166 |
| 214 | meQTL | 8:120188188 | 0.00034626 |
| 215 | meQTL | 8:120187687 | 0.00035186 |
| 216 | meQTL | 8:11567140  | 0.00036077 |
| 217 | meQTL | 15:77820712 | 0.00040314 |
| 218 | meQTL | 15:77821331 | 0.00040501 |
| 219 | meQTL | 16:8949455  | 0.00042436 |
| 220 | meQTL | 7:2830243   | 0.00043287 |
| 221 | meQTL | 11:64412877 | 0.00066627 |
| 222 | meQTL | 11:67773897 | 0.00068801 |
| 223 | meQTL | 9:114703920 | 0.00069048 |
| 224 | meQTL | 7:157735966 | 0.00078443 |
| 225 | meQTL | 1:14448184  | 0.00080144 |
| 226 | meQTL | 11:64412086 | 0.00085162 |
| 227 | meQTL | 8:114451439 | 0.00086926 |
| 228 | meQTL | 1:18095997  | 0.0008736  |
| 229 | meQTL | 8:114448786 | 0.00088511 |
| 230 | meQTL | 1:14453185  | 0.00089888 |
| 231 | meQTL | 14:25518326 | 0.00108932 |
| 232 | meQTL | 7:157736304 | 0.00109375 |
| 233 | meQTL | 1:14449321  | 0.00122125 |

|     |       |              |            |
|-----|-------|--------------|------------|
| 234 | meQTL | 7:157737139  | 0.00122951 |
| 235 | meQTL | 7:157736936  | 0.00125002 |
| 236 | meQTL | 2:9299699    | 0.00140137 |
| 237 | meQTL | 14:25515815  | 0.00142675 |
| 238 | meQTL | 8:102984352  | 0.0014351  |
| 239 | meQTL | 1:14447897   | 0.00154348 |
| 240 | meQTL | 7:157736235  | 0.00155561 |
| 241 | meQTL | 1:14448571   | 0.00156893 |
| 242 | meQTL | 1:14448388   | 0.00158264 |
| 243 | meQTL | 1:53073327   | 0.0017361  |
| 244 | meQTL | 16:55477585  | 0.00175692 |
| 245 | meQTL | 16:55477696  | 0.00179829 |
| 246 | meQTL | 3:196508551  | 0.00186682 |
| 247 | meQTL | 16:55475736  | 0.00187608 |
| 248 | meQTL | 16:55475668  | 0.00189671 |
| 249 | meQTL | 3:196507081  | 0.00206176 |
| 250 | meQTL | 14:25519106  | 0.00214072 |
| 251 | meQTL | 13:101316223 | 0.00248366 |
| 252 | meQTL | 15:74659609  | 0.00260113 |
| 253 | meQTL | 15:74661894  | 0.00262468 |
| 254 | meQTL | 3:196506153  | 0.00277882 |
| 255 | meQTL | 12:121168083 | 0.00303502 |
| 256 | meQTL | 8:8824837    | 0.00331557 |
| 257 | meQTL | 3:122609206  | 0.00339134 |
| 258 | meQTL | 2:101802078  | 0.00339447 |
| 259 | meQTL | 12:121170339 | 0.00341019 |
| 260 | meQTL | 3:42266346   | 0.00359962 |
| 261 | meQTL | 2:240294786  | 0.00362593 |
| 262 | meQTL | 2:240294969  | 0.00365737 |
| 263 | meQTL | 15:74662811  | 0.00451017 |
| 264 | meQTL | 2:103297704  | 0.00465448 |
| 265 | meQTL | 5:153582454  | 0.00570937 |
| 266 | meQTL | 3:27867461   | 0.00571931 |
| 267 | meQTL | 17:15414354  | 0.00642809 |
| 268 | meQTL | 20:47939664  | 0.00678305 |
| 269 | meQTL | 5:172093821  | 0.00764608 |
| 270 | meQTL | 15:59697546  | 0.00765787 |
| 271 | meQTL | 11:20899163  | 0.00770956 |
| 272 | meQTL | 15:59697236  | 0.00780102 |
| 273 | meQTL | 5:172092620  | 0.00812834 |
| 274 | meQTL | 11:63039972  | 0.00820448 |
| 275 | meQTL | 11:65631881  | 0.0091904  |
| 276 | meQTL | 11:65632262  | 0.00933662 |
| 277 | meQTL | 5:9854563    | 0.0094975  |
| 278 | meQTL | 16:55479687  | 0.00957827 |

|     |       |              |            |
|-----|-------|--------------|------------|
| 279 | meQTL | 16:55481549  | 0.00978943 |
| 280 | meQTL | 16:55482198  | 0.00986373 |
| 281 | meQTL | 5:9853378    | 0.00986841 |
| 282 | meQTL | 16:55482117  | 0.00988274 |
| 283 | meQTL | 16:55478822  | 0.00991242 |
| 284 | meQTL | 16:55478046  | 0.00992066 |
| 285 | meQTL | 16:55478701  | 0.00992219 |
| 286 | meQTL | 16:55477451  | 0.00995967 |
| 287 | meQTL | 16:55480809  | 0.00998588 |
| 288 | meQTL | 16:55483037  | 0.01001989 |
| 289 | meQTL | 16:55477447  | 0.01005513 |
| 290 | meQTL | 16:55481269  | 0.01006834 |
| 291 | meQTL | 8:94242523   | 0.01009192 |
| 292 | meQTL | 16:55475437  | 0.01013791 |
| 293 | meQTL | 9:116935764  | 0.01024341 |
| 294 | meQTL | 16:55476494  | 0.01025544 |
| 295 | meQTL | 9:116935696  | 0.01026014 |
| 296 | meQTL | 16:55476449  | 0.01027733 |
| 297 | meQTL | 1:157084039  | 0.0107677  |
| 298 | meQTL | 5:9851399    | 0.01105215 |
| 299 | meQTL | 2:9285990    | 0.0115177  |
| 300 | meQTL | 16:55483244  | 0.0117342  |
| 301 | meQTL | 16:55479400  | 0.01186086 |
| 302 | meQTL | 16:55478444  | 0.01188712 |
| 303 | meQTL | 16:55479576  | 0.01231748 |
| 304 | meQTL | 16:55479525  | 0.01236153 |
| 305 | meQTL | 16:55478556  | 0.01240523 |
| 306 | meQTL | 16:55478526  | 0.01240966 |
| 307 | meQTL | 2:10361023   | 0.0125052  |
| 308 | meQTL | 16:55477159  | 0.01255584 |
| 309 | meQTL | 16:55477008  | 0.01261012 |
| 310 | meQTL | 16:55476322  | 0.01262558 |
| 311 | meQTL | 16:55476343  | 0.01272386 |
| 312 | meQTL | 16:55475874  | 0.01273993 |
| 313 | meQTL | 16:55476052  | 0.01278148 |
| 314 | meQTL | 16:55475129  | 0.01284986 |
| 315 | meQTL | 16:55475352  | 0.01288154 |
| 316 | meQTL | 16:55482873  | 0.01359253 |
| 317 | meQTL | 14:66254578  | 0.01373768 |
| 318 | meQTL | 9:119616042  | 0.01400218 |
| 319 | meQTL | 2:9285525    | 0.01438464 |
| 320 | meQTL | 10:14535113  | 0.01459751 |
| 321 | meQTL | 20:50423564  | 0.0147066  |
| 322 | meQTL | 2:9284616    | 0.01519562 |
| 323 | meQTL | 10:112586096 | 0.0153454  |



|     |       |              |            |
|-----|-------|--------------|------------|
| 324 | meQTL | 8:94715291   | 0.01535933 |
| 325 | meQTL | 14:66255781  | 0.01547221 |
| 326 | meQTL | 11:64377336  | 0.01551171 |
| 327 | meQTL | 9:116935688  | 0.01573551 |
| 328 | meQTL | 2:9285206    | 0.01593781 |
| 329 | meQTL | 16:69163143  | 0.01666844 |
| 330 | meQTL | 11:64372302  | 0.01668672 |
| 331 | meQTL | 11:65621293  | 0.01899393 |
| 332 | meQTL | 11:65621057  | 0.0190182  |
| 333 | meQTL | 14:56711146  | 0.0194257  |
| 334 | meQTL | 12:120393756 | 0.02078294 |
| 335 | meQTL | 2:10288547   | 0.02109612 |
| 336 | meQTL | 14:66253437  | 0.02142277 |
| 337 | meQTL | 2:10359271   | 0.02283771 |
| 338 | meQTL | 15:59701847  | 0.02283888 |
| 339 | meQTL | 1:161043764  | 0.02378405 |
| 340 | meQTL | 14:25425252  | 0.02424066 |
| 341 | meQTL | 15:59701640  | 0.02529355 |
| 342 | meQTL | 8:107833222  | 0.02565955 |
| 343 | meQTL | 1:161043735  | 0.03004231 |
| 344 | meQTL | 8:107835922  | 0.0307742  |
| 345 | meQTL | 16:55528127  | 0.03125284 |
| 346 | meQTL | 16:55527986  | 0.03129493 |
| 347 | meQTL | 8:107836172  | 0.03138101 |
| 348 | meQTL | 9:100528320  | 0.03148157 |
| 349 | meQTL | 8:107836362  | 0.03166953 |
| 350 | meQTL | 12:50583872  | 0.03185783 |
| 351 | meQTL | 8:107836447  | 0.03203826 |
| 352 | meQTL | 8:107836730  | 0.03225098 |
| 353 | meQTL | 8:107836800  | 0.03249408 |
| 354 | meQTL | 10:23659587  | 0.03343644 |
| 355 | meQTL | 14:25423714  | 0.03361192 |
| 356 | meQTL | 16:55527026  | 0.03379528 |
| 357 | meQTL | 8:107837750  | 0.03421377 |
| 358 | meQTL | 16:55527113  | 0.03439357 |
| 359 | meQTL | 14:56711824  | 0.03589328 |
| 360 | meQTL | 10:23660531  | 0.03668929 |
| 361 | meQTL | 10:6504126   | 0.03670823 |
| 362 | meQTL | 10:23661291  | 0.03716188 |
| 363 | meQTL | 16:81870022  | 0.03819542 |
| 364 | meQTL | 8:107840839  | 0.03829959 |
| 365 | meQTL | 8:107839128  | 0.03883914 |
| 366 | meQTL | 8:107839322  | 0.03942668 |
| 367 | meQTL | 8:107839337  | 0.03942802 |
| 368 | meQTL | 8:107841205  | 0.03996542 |

|     |       |             |            |
|-----|-------|-------------|------------|
| 369 | meQTL | 20:18265525 | 0.04302224 |
| 370 | meQTL | 14:22248839 | 0.04343635 |
| 371 | meQTL | 14:22248348 | 0.04437434 |
| 372 | meQTL | 20:50423643 | 0.0466798  |
| 373 | meQTL | 15:69454261 | 0.04746009 |
| 1   | coQTL | 1:95057293  | 0.00937089 |
| 2   | coQTL | 1:107002447 | 0.00054533 |
| 3   | coQTL | 1:107004365 | 0.00054533 |
| 4   | coQTL | 1:107009801 | 0.001705   |
| 5   | coQTL | 1:157381033 | 0.00895797 |
| 6   | coQTL | 2:10671555  | 0.00032107 |
| 7   | coQTL | 2:39791925  | 0.00882209 |
| 8   | coQTL | 2:40947022  | 0.00356295 |
| 9   | coQTL | 2:40949168  | 0.00295292 |
| 10  | coQTL | 2:40950118  | 0.00356295 |
| 11  | coQTL | 2:42136996  | 0.00421699 |
| 12  | coQTL | 2:42137215  | 0.00106134 |
| 13  | coQTL | 2:42137293  | 0.00073741 |
| 14  | coQTL | 2:43839090  | 0.00734334 |
| 15  | coQTL | 2:43839896  | 0.00734334 |
| 16  | coQTL | 2:43840048  | 0.00734334 |
| 17  | coQTL | 2:43841119  | 0.00734334 |
| 18  | coQTL | 2:43841269  | 0.00704516 |
| 19  | coQTL | 2:82679503  | 0.00121157 |
| 20  | coQTL | 2:82688980  | 0.00190449 |
| 21  | coQTL | 2:103559294 | 0.0076086  |
| 22  | coQTL | 2:133629564 | 0.00054588 |
| 23  | coQTL | 2:239417840 | 0.00377577 |
| 24  | coQTL | 3:14242148  | 0.00809908 |
| 25  | coQTL | 3:24680131  | 0.00057624 |
| 26  | coQTL | 3:24685069  | 0.00057624 |
| 27  | coQTL | 3:26124633  | 0.00196199 |
| 28  | coQTL | 3:77377533  | 0.00542131 |
| 29  | coQTL | 3:77377731  | 0.00542131 |
| 30  | coQTL | 3:77378207  | 0.0054261  |
| 31  | coQTL | 3:77382285  | 0.00991803 |
| 32  | coQTL | 3:77384295  | 0.00991803 |
| 33  | coQTL | 3:115981443 | 0.00491336 |
| 34  | coQTL | 3:115982415 | 0.00928987 |
| 35  | coQTL | 3:115983248 | 0.00928987 |
| 36  | coQTL | 4:104293598 | 0.00673255 |
| 37  | coQTL | 4:183383425 | 0.00583007 |
| 38  | coQTL | 5:9844926   | 0.00974845 |
| 39  | coQTL | 5:9851399   | 0.0095592  |
| 40  | coQTL | 5:9853378   | 0.00904782 |

|    |       |             |            |
|----|-------|-------------|------------|
| 41 | coQTL | 5:9854563   | 0.00904782 |
| 42 | coQTL | 5:31839299  | 0.00937666 |
| 43 | coQTL | 5:58676173  | 0.00762617 |
| 44 | coQTL | 5:172145086 | 0.00982512 |
| 45 | coQTL | 5:172146166 | 0.00982512 |
| 46 | coQTL | 5:172147182 | 0.00962384 |
| 47 | coQTL | 5:172148182 | 0.00962384 |
| 48 | coQTL | 5:172148934 | 0.00962384 |
| 49 | coQTL | 6:164146179 | 0.00389594 |
| 50 | coQTL | 8:1600669   | 0.00498536 |
| 51 | coQTL | 8:1603043   | 0.00412249 |
| 52 | coQTL | 8:13564225  | 0.00583752 |
| 53 | coQTL | 8:72618673  | 0.00458044 |
| 54 | coQTL | 8:72619458  | 0.00458044 |
| 55 | coQTL | 8:72619613  | 0.00458044 |
| 56 | coQTL | 8:72620818  | 0.00421761 |
| 57 | coQTL | 8:76476396  | 0.00920932 |
| 58 | coQTL | 8:76476457  | 0.00920932 |
| 59 | coQTL | 8:76476670  | 0.00920932 |
| 60 | coQTL | 8:76477368  | 0.00920932 |
| 61 | coQTL | 8:102981279 | 0.00734969 |
| 62 | coQTL | 8:122002595 | 0.0090656  |
| 63 | coQTL | 8:122002754 | 0.0090656  |
| 64 | coQTL | 9:1632203   | 0.00843994 |
| 65 | coQTL | 9:5610320   | 0.00931348 |
| 66 | coQTL | 9:5611912   | 0.00962145 |
| 67 | coQTL | 9:5612177   | 0.00464447 |
| 68 | coQTL | 9:5612750   | 0.00674231 |
| 69 | coQTL | 9:20781979  | 0.00868207 |
| 70 | coQTL | 9:82457250  | 0.00571477 |
| 71 | coQTL | 9:117855507 | 0.0024783  |
| 72 | coQTL | 10:9192570  | 2.31E-05   |
| 73 | coQTL | 10:9193193  | 2.18E-05   |
| 74 | coQTL | 10:9193901  | 2.18E-05   |
| 75 | coQTL | 10:9193998  | 2.18E-05   |
| 76 | coQTL | 10:9194006  | 2.18E-05   |
| 77 | coQTL | 10:9196330  | 2.32E-05   |
| 78 | coQTL | 10:9197666  | 2.32E-05   |
| 79 | coQTL | 10:9200102  | 0.00025048 |
| 80 | coQTL | 10:9203792  | 0.00024103 |
| 81 | coQTL | 10:9205270  | 0.00024103 |
| 82 | coQTL | 10:9207621  | 2.19E-05   |
| 83 | coQTL | 10:9207877  | 2.19E-05   |
| 84 | coQTL | 10:9207928  | 2.19E-05   |
| 85 | coQTL | 10:9826151  | 0.00738161 |

|     |       |             |            |
|-----|-------|-------------|------------|
| 86  | coQTL | 10:14501236 | 0.00726919 |
| 87  | coQTL | 10:49942417 | 0.00581547 |
| 88  | coQTL | 10:52006233 | 0.00788291 |
| 89  | coQTL | 10:52006252 | 0.00632516 |
| 90  | coQTL | 10:52006502 | 0.00788291 |
| 91  | coQTL | 10:52006528 | 0.00632516 |
| 92  | coQTL | 10:52006649 | 0.00788291 |
| 93  | coQTL | 10:52006741 | 0.00788291 |
| 94  | coQTL | 10:52006771 | 0.00788291 |
| 95  | coQTL | 10:52007179 | 0.00788291 |
| 96  | coQTL | 10:52007281 | 0.00788291 |
| 97  | coQTL | 10:52007347 | 0.00788291 |
| 98  | coQTL | 10:52007626 | 0.00632516 |
| 99  | coQTL | 10:52008748 | 0.0025629  |
| 100 | coQTL | 10:52009061 | 0.00788291 |
| 101 | coQTL | 10:61744247 | 0.00132772 |
| 102 | coQTL | 10:61745158 | 0.00350281 |
| 103 | coQTL | 10:61745771 | 0.00350281 |
| 104 | coQTL | 10:85242245 | 0.00986481 |
| 105 | coQTL | 10:85258657 | 0.00756431 |
| 106 | coQTL | 10:85258710 | 0.00756431 |
| 107 | coQTL | 11:8948058  | 0.00670342 |
| 108 | coQTL | 11:19435430 | 0.0068028  |
| 109 | coQTL | 11:19435457 | 0.0068028  |
| 110 | coQTL | 11:19435829 | 0.00777041 |
| 111 | coQTL | 11:19439399 | 0.00777041 |
| 112 | coQTL | 11:19439463 | 0.00777041 |
| 113 | coQTL | 11:19439588 | 0.00777041 |
| 114 | coQTL | 11:19439595 | 0.00777041 |
| 115 | coQTL | 11:19440354 | 0.00777041 |
| 116 | coQTL | 11:19440455 | 0.00777041 |
| 117 | coQTL | 11:19440493 | 0.00752438 |
| 118 | coQTL | 11:19440567 | 0.00777041 |
| 119 | coQTL | 11:19441522 | 0.00752438 |
| 120 | coQTL | 11:19441717 | 0.00777041 |
| 121 | coQTL | 11:19441858 | 0.00777041 |
| 122 | coQTL | 11:19442926 | 0.00752438 |
| 123 | coQTL | 11:19466475 | 0.00720895 |
| 124 | coQTL | 11:65458310 | 0.00494324 |
| 125 | coQTL | 11:65464000 | 0.00494324 |
| 126 | coQTL | 12:83422599 | 0.00067548 |
| 127 | coQTL | 12:83423340 | 0.00057492 |
| 128 | coQTL | 12:83424175 | 0.00096374 |
| 129 | coQTL | 12:84143176 | 0.00622051 |
| 130 | coQTL | 12:92174205 | 0.00210524 |

|     |       |              |            |
|-----|-------|--------------|------------|
| 131 | coQTL | 12:96435239  | 0.00448924 |
| 132 | coQTL | 12:96437926  | 0.00595761 |
| 133 | coQTL | 12:103542414 | 0.0006334  |
| 134 | coQTL | 12:104182968 | 0.00715356 |
| 135 | coQTL | 12:105689161 | 0.00610841 |
| 136 | coQTL | 12:105689315 | 0.00610841 |
| 137 | coQTL | 12:105689407 | 0.00610841 |
| 138 | coQTL | 12:105689523 | 0.00610841 |
| 139 | coQTL | 12:105689566 | 0.00844684 |
| 140 | coQTL | 12:105690017 | 0.00176446 |
| 141 | coQTL | 12:105690259 | 0.00610841 |
| 142 | coQTL | 12:105691466 | 0.00610841 |
| 143 | coQTL | 12:105694513 | 0.00610841 |
| 144 | coQTL | 12:105694812 | 0.00610841 |
| 145 | coQTL | 12:105695312 | 0.00585921 |
| 146 | coQTL | 12:105695459 | 0.00610841 |
| 147 | coQTL | 12:105695541 | 0.00610841 |
| 148 | coQTL | 12:105695861 | 0.00610841 |
| 149 | coQTL | 12:107415073 | 0.00569431 |
| 150 | coQTL | 12:107417182 | 0.00569431 |
| 151 | coQTL | 12:107423275 | 0.00569431 |
| 152 | coQTL | 12:107440145 | 0.00569431 |
| 153 | coQTL | 12:107440824 | 0.00569431 |
| 154 | coQTL | 12:107443546 | 0.00569431 |
| 155 | coQTL | 12:107445137 | 0.00569431 |
| 156 | coQTL | 12:107445881 | 0.00569431 |
| 157 | coQTL | 12:107454152 | 0.00569431 |
| 158 | coQTL | 12:107459096 | 0.00569431 |
| 159 | coQTL | 12:107472206 | 0.00569431 |
| 160 | coQTL | 12:107477523 | 0.00472731 |
| 161 | coQTL | 12:107483888 | 0.00472731 |
| 162 | coQTL | 12:107487069 | 0.00639625 |
| 163 | coQTL | 12:107488186 | 0.00472731 |
| 164 | coQTL | 12:107489155 | 0.00472731 |
| 165 | coQTL | 12:107491592 | 0.00639625 |
| 166 | coQTL | 12:107497664 | 0.00581391 |
| 167 | coQTL | 12:107499824 | 0.00472731 |
| 168 | coQTL | 12:107503125 | 0.00472731 |
| 169 | coQTL | 12:107505640 | 0.00639625 |
| 170 | coQTL | 12:107505669 | 0.00472731 |
| 171 | coQTL | 12:107506174 | 0.00472731 |
| 172 | coQTL | 12:107507728 | 0.00472731 |
| 173 | coQTL | 13:97522994  | 0.0066547  |
| 174 | coQTL | 13:97525122  | 0.0066547  |
| 175 | coQTL | 13:97525422  | 0.0066547  |

|     |       |             |            |
|-----|-------|-------------|------------|
| 176 | coQTL | 13:97525809 | 0.0066547  |
| 177 | coQTL | 13:97526119 | 0.0066547  |
| 178 | coQTL | 13:97528123 | 0.00736826 |
| 179 | coQTL | 15:58740094 | 0.00367498 |
| 180 | coQTL | 15:84441823 | 0.00764143 |
| 181 | coQTL | 15:84452957 | 0.00764143 |
| 182 | coQTL | 15:84453788 | 0.00764143 |
| 183 | coQTL | 15:84453883 | 0.00764143 |
| 184 | coQTL | 15:91151276 | 0.00074957 |
| 185 | coQTL | 15:91152911 | 0.00063644 |
| 186 | coQTL | 15:91180705 | 0.00517847 |
| 187 | coQTL | 15:91186461 | 0.00203955 |
| 188 | coQTL | 16:8947128  | 0.00846907 |
| 189 | coQTL | 16:8949455  | 0.0054626  |
| 190 | coQTL | 16:16037261 | 0.00850095 |
| 191 | coQTL | 16:61041750 | 0.00356953 |
| 192 | coQTL | 16:61041758 | 0.00356953 |
| 193 | coQTL | 16:61042482 | 0.00356953 |
| 194 | coQTL | 16:61042822 | 0.00356953 |
| 195 | coQTL | 16:61042959 | 0.00356953 |
| 196 | coQTL | 16:61046387 | 0.00356953 |
| 197 | coQTL | 16:61046749 | 0.00356953 |
| 198 | coQTL | 16:69131281 | 0.00461822 |
| 199 | coQTL | 17:32472860 | 0.0099506  |
| 200 | coQTL | 18:18559675 | 0.00374803 |
| 201 | coQTL | 18:18602977 | 0.00845554 |
| 202 | coQTL | 18:19100854 | 0.00023254 |
| 203 | coQTL | 18:59321737 | 0.00017108 |
| 204 | coQTL | 20:47854020 | 0.00207179 |
| 205 | coQTL | 20:47857067 | 0.00224721 |
| 206 | coQTL | 20:47866411 | 0.00224721 |
| 207 | coQTL | 20:47889958 | 0.002077   |
| 208 | coQTL | 20:47900164 | 0.0021668  |
| 209 | coQTL | 20:47903826 | 0.00225637 |
| 210 | coQTL | 20:47913578 | 0.00225637 |
| 211 | coQTL | 20:50423643 | 0.00103109 |
| 212 | coQTL | 20:50446692 | 0.00165171 |
| 213 | coQTL | 20:50449214 | 0.00036901 |
| 214 | coQTL | 20:50449250 | 0.00018053 |
| 215 | coQTL | 20:50449781 | 0.00018053 |
| 216 | coQTL | 20:50450541 | 0.00039486 |
| 217 | coQTL | 20:50450560 | 0.00018053 |
| 218 | coQTL | 20:50451294 | 0.00019926 |
| 219 | coQTL | 20:50451967 | 0.00033897 |
| 220 | coQTL | 20:50452198 | 0.00019926 |

|     |       |             |            |
|-----|-------|-------------|------------|
| 221 | coQTL | 20:50455228 | 0.00219286 |
| 222 | coQTL | 20:50455735 | 0.00014805 |
| 223 | coQTL | 20:50455767 | 0.00182103 |
| 224 | coQTL | 20:50455860 | 0.00024283 |
| 225 | coQTL | 20:50456014 | 0.00024283 |
| 226 | coQTL | 20:50456180 | 0.00024283 |
| 227 | coQTL | 20:50456237 | 0.00024283 |
| 228 | coQTL | 21:30309552 | 0.00399409 |
| 229 | coQTL | 21:30312630 | 0.0029069  |
